# Supplementary material for: Fabrication and Evaluation of Electrospun Silk Fibroin/Halloysite Nanotube Biomaterials for Soft Tissue Regeneration
Source: MDPI journal article supplement (doi:10.3390/polym14153004), 2022-07-25
Supplement: s1 [file s1]

Supplementary Information:

# Fabrication and Evaluation of Electrospun Silk Fibroin/Halloysite Nanotube Biomaterials for Soft Tissue Regeneration

Soheila Mohammadzadehmoghadam<sup>1,2</sup>, Catherine F. LeGrand<sup>2,3</sup>, Chee-Wai Wong<sup>2,3</sup>, Beverley F. Kinnear<sup>2,3</sup>, Yu Dong<sup>1,\*</sup>, and Deirdre R. Coombe<sup>2,3,\*</sup>

<sup>1</sup> School of Civil and Mechanical Engineering, Curtin University, Bentley WA 6102 Australia; sm.mohamadzade@gmail.com

<sup>2</sup> Curtin Health Innovation Research Institute, Faculty of Health Sciences, Curtin University, Bentley, WA 6102 Australia

<sup>3</sup> Curtin Medical School, Pharmacy and Biomedical Sciences, Curtin University, Bentley, WA 6102 Australia

\* Correspondence: Y.D. Y.Dong@curtin.edu.au; D.R.C. D.Coombe@curtin.edu.au

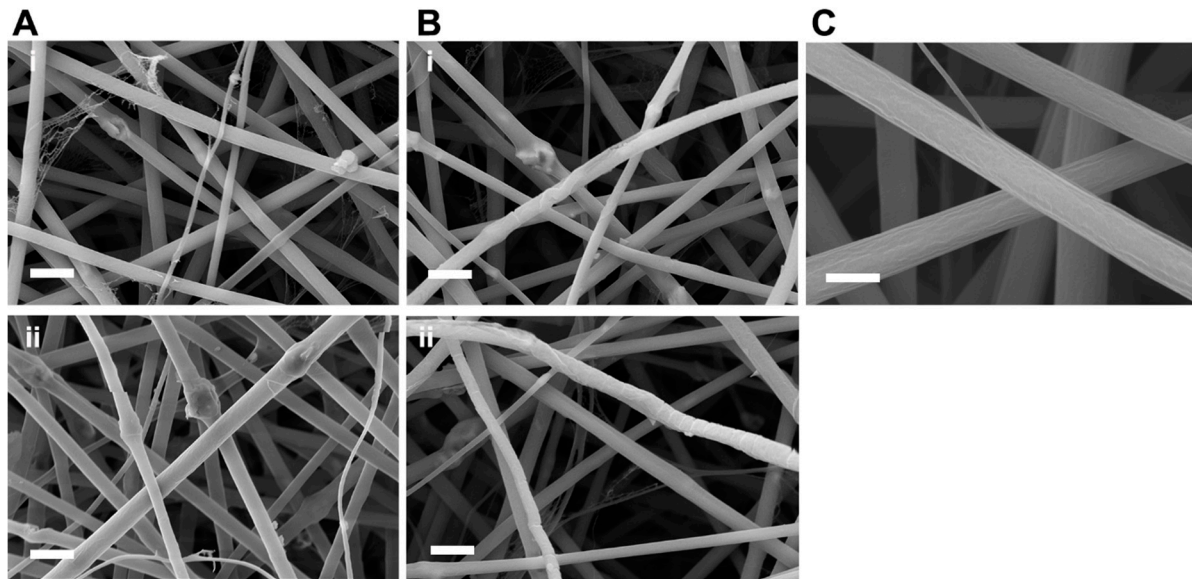

**Figure S1.** Fibre abnormalities in scaffolds with high HNT content (A) SF/HNT 5% wt% and (B) SF/HNT 7% wt% scaffolds; (i & ii) are images from different replicate scaffolds; Scale bar: 1  $\mu\text{m}$ . (C) SF scaffold, no HNT; Scale bar 400 nm
